# Supplementary material for: Quenching of persistent photocurrent in an oxide UV photodetector
Source: Royal Society of Chemistry journal article supplement (doi:10.1039/d0tc05997h), 2021-01-01
Supplement: d0tc05997h1.pdf [file d0tc05997h1.pdf]

## Electronic Supplementary Information

### Quenching of Persistent Photocurrent in Oxide UV Photodetector

Baoshi Qiao,<sup>ab</sup> Zhenzhong Zhang,<sup>\*ac</sup> Xiuhua Xie,<sup>a</sup> Binghui Li,<sup>a</sup> Xing Chen,<sup>a</sup> Haifeng Zhao,<sup>a</sup> Kewei Liu,<sup>a</sup> Lei Liu,<sup>a</sup> Dezhen Shen<sup>\*a</sup>

Received 00th January 20xx,  
Accepted 00th January 20xx

DOI: 10.1039/x0xx00000x

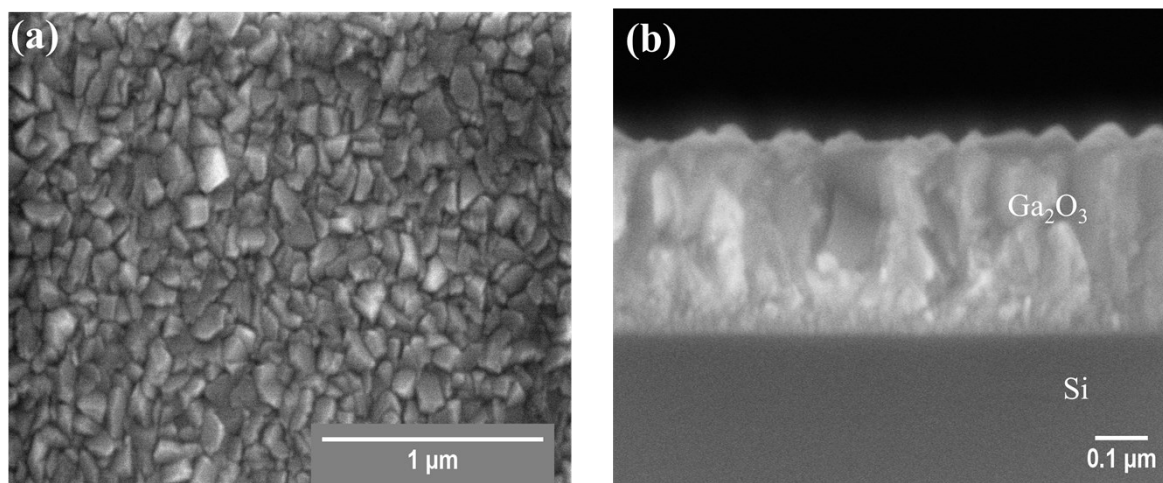

**Figure S1** a) The top-view and b) cross-section SEM images of Ga<sub>2</sub>O<sub>3</sub> thin film.

<sup>a</sup> State Key Laboratory of Luminescence and Applications, Changchun Institute of Optics, Fine Mechanics and Physics, Chinese Academy of Sciences, No.3888 Dongnanhu Road, Changchun, 130033, People's Republic of China. E-mail: zhangzz@dlut.edu.cn; shendz@ciomp.ac.cn

<sup>b</sup> University of the Chinese Academy of Sciences, Beijing 100049, People's Republic of China.

<sup>c</sup> School of Microelectronics, Dalian University of Technology, Dalian, Liaoning 116024, People's Republic of China.

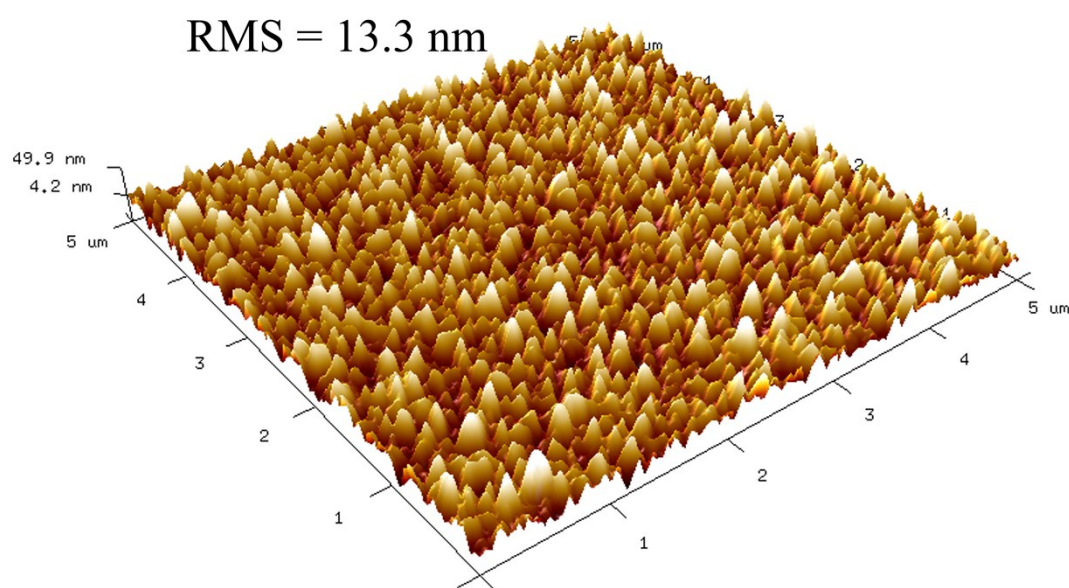

**Figure S2** The atomic force microscopy of  $\text{Ga}_2\text{O}_3$ . The root-mean-square surface roughness is 13.3 nm.

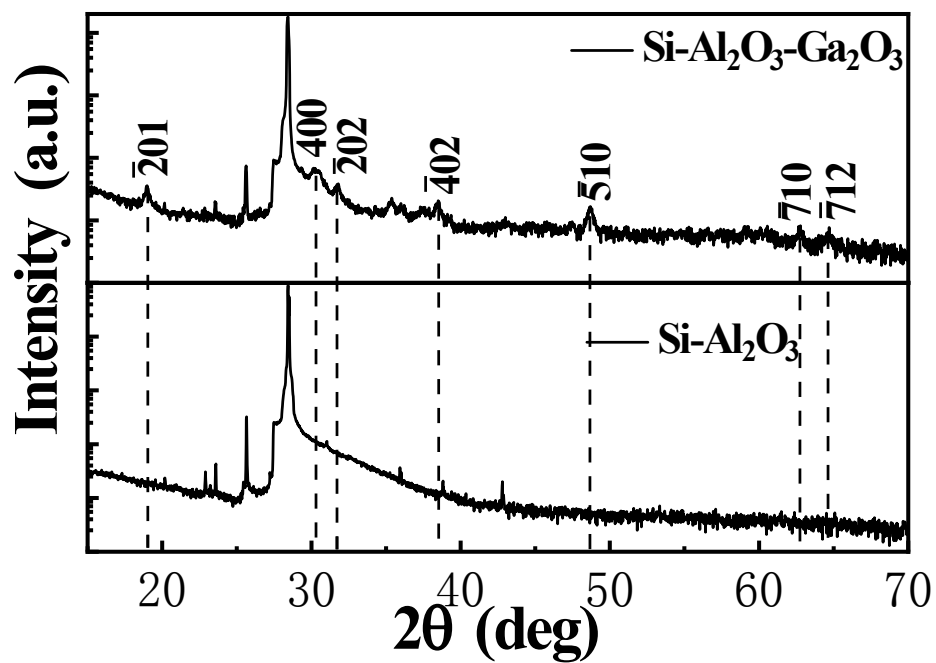

**Figure S3** The XRD pattern of Ga<sub>2</sub>O<sub>3</sub> with logarithmic coordinates.

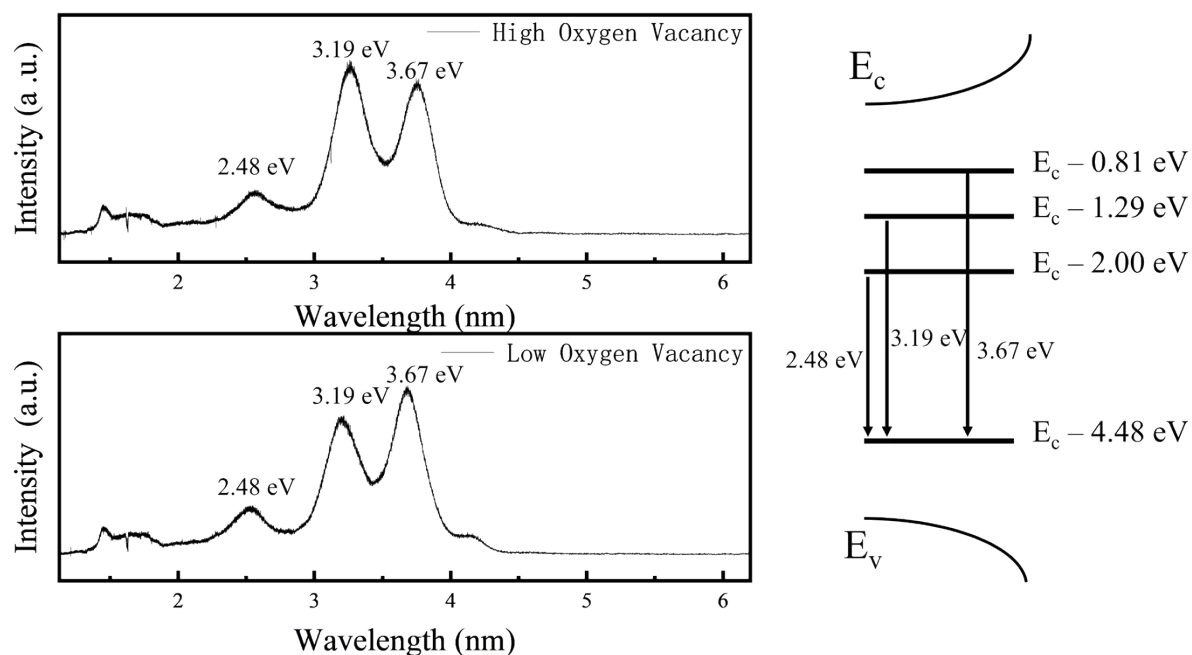

**Figure S4** The room-temperature photoluminescence spectra of high- and low-oxygen vacancy. A 193-nm laser was used as the excitation source. The position of band edges and defect level is shown on the right.

The main PL peaks correspond with emissions between defect levels in previous works.<sup>1</sup> The states of  $E_c - 0.81$  eV and  $E_c - 4.48$  eV are related to the extrinsic impurities and change less.<sup>2</sup> The states of  $E_c - 1.29$  eV is mostly related to the oxygen vacancy and is regarded to results in the 3.19 eV-PL peak.<sup>3-4</sup> The PL spectra indicate the reduction of  $V_O$  density in low  $V_O$  density materials.

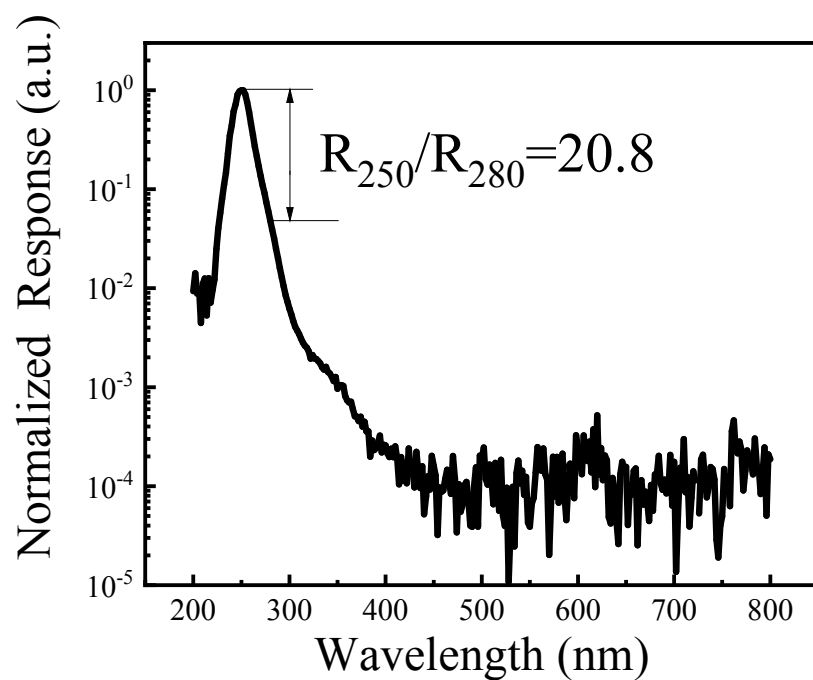

**Figure S5** The spectral response of Si/Al<sub>2</sub>O<sub>3</sub>/Ga<sub>2</sub>O<sub>3</sub> device. The -3 dB cutoff is 260 nm.

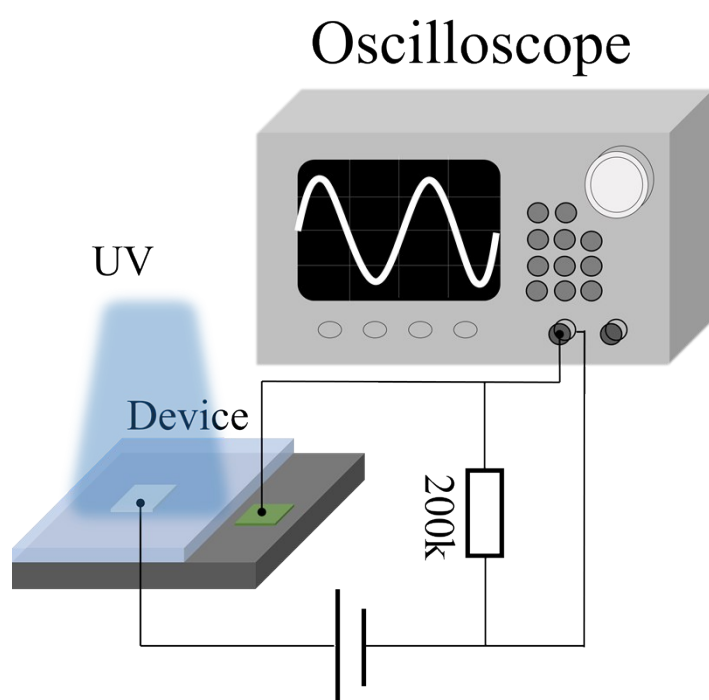

**Figure S6** The configuration of reset-speed measurement.

## References

- 1 Z. Wang, X. Chen, F.-F. Ren, S. Gu and J. Ye, *J. Phys. D Appl. Phys.* **2020**, 54, 043002.
- 2 E. Farzana, M. F. Chaiken, T. E. Blue, A. R. Arehart and S. A. Ringel, *APL Materials*, **2019**, 7, 022502.
- 3 L. Dong, R. Jia, B. Xin, B. Peng and Y. Zhang, *Sci. Rep.* **2017**, 7, 40160.
- 4 R. Jangir, S. Porwal, P. Tiwari, P. Mondal, S. K. Rai, T. Ganguli, S. M. Oak and S. K. Deb, *J. Appl. Phys.* **2012**, 112, 034307.
